# Supplementary material for: Au-Coated ZnO Surface-Enhanced Raman Scattering (SERS) Substrates: Synthesis, Characterization, and Applications in Exosome Detection
Source: Preprints.org preprint supplement (doi:10.20944/preprints202310.1607.v1), 2023-10-25
Supplement: Supplementary file 1 [file supplementary]

Supporting Information

Au-coated ZnO Surface-Enhanced Raman Scattering (SERS) Substrates: Synthesis, Characterization, and Applications in Exosome Detection

Samuel Adesoye 1, Saqer Al Abdullah 1, Anjali Kumari 1, Parth Desai 2, Gayani Pathiraja 2, Kyle Nowlin 2 and Kristen Dellinger 1,*

1 Department of Nanoengineering, Joint School of Nanoscience and Nanoengineering, North Carolina A&T State University, 2907 E Gate City Blvd, Greensboro, NC 27401 USA; soadesoye@aggies.ncat.edu (S.A.); smalabdullah@aggies.ncat.edu (S.A.A.); akumari@aggies.ncat.edu (A.K.)

2 Department of Nanoscience, Joint School of Nanoscience and Nanoengineering,
University of North Carolina at Greensboro, 2907 E Gate City Blvd, Greensboro, NC 27401, USA; phdesai@uncg.edu (P.D.); gcpathir@uncg.edu (G.P.); ksnowlin@uncg.edu (K.N.)

***** Correspondence: kdellinger@ncat.edu (K.D.)


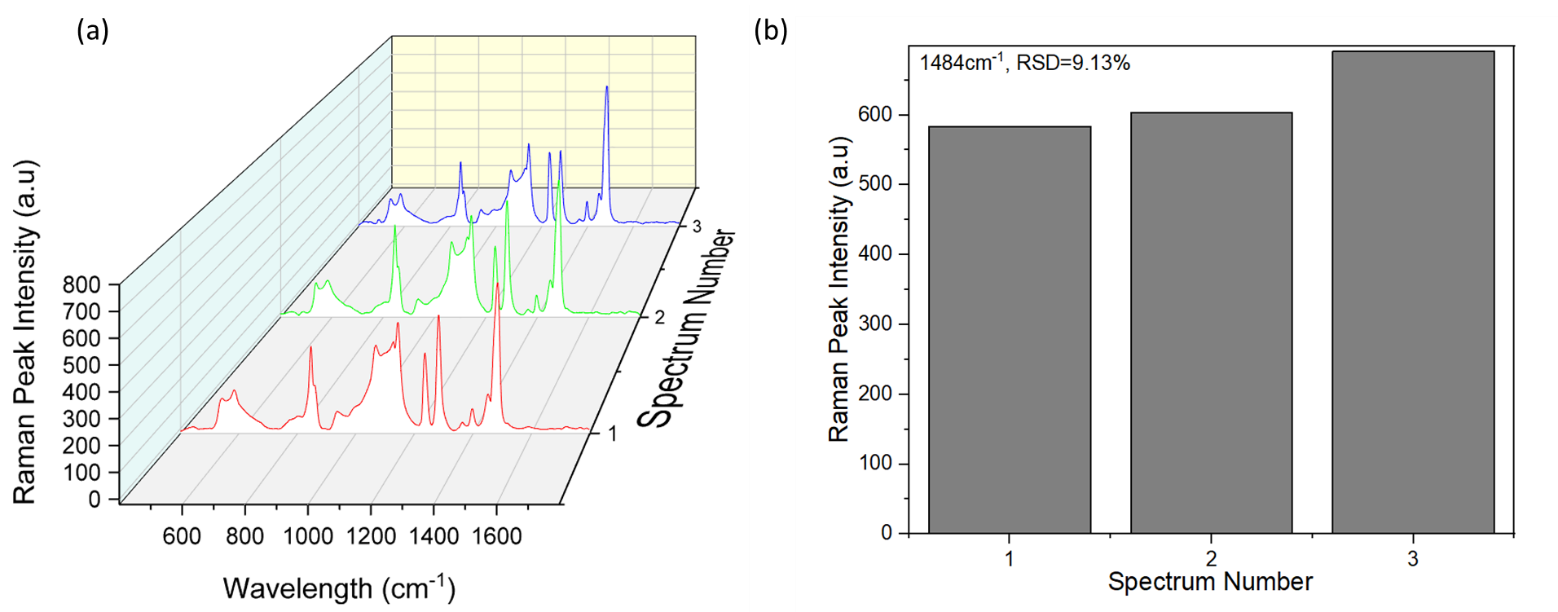


**Figure S1.** (a) SERS spectra of three random measurements of N2a on the optimal substrate (b) SERS peak intensity at wavelength 1484cm-1 of the three random measurements of N2a on the optimal substrate.


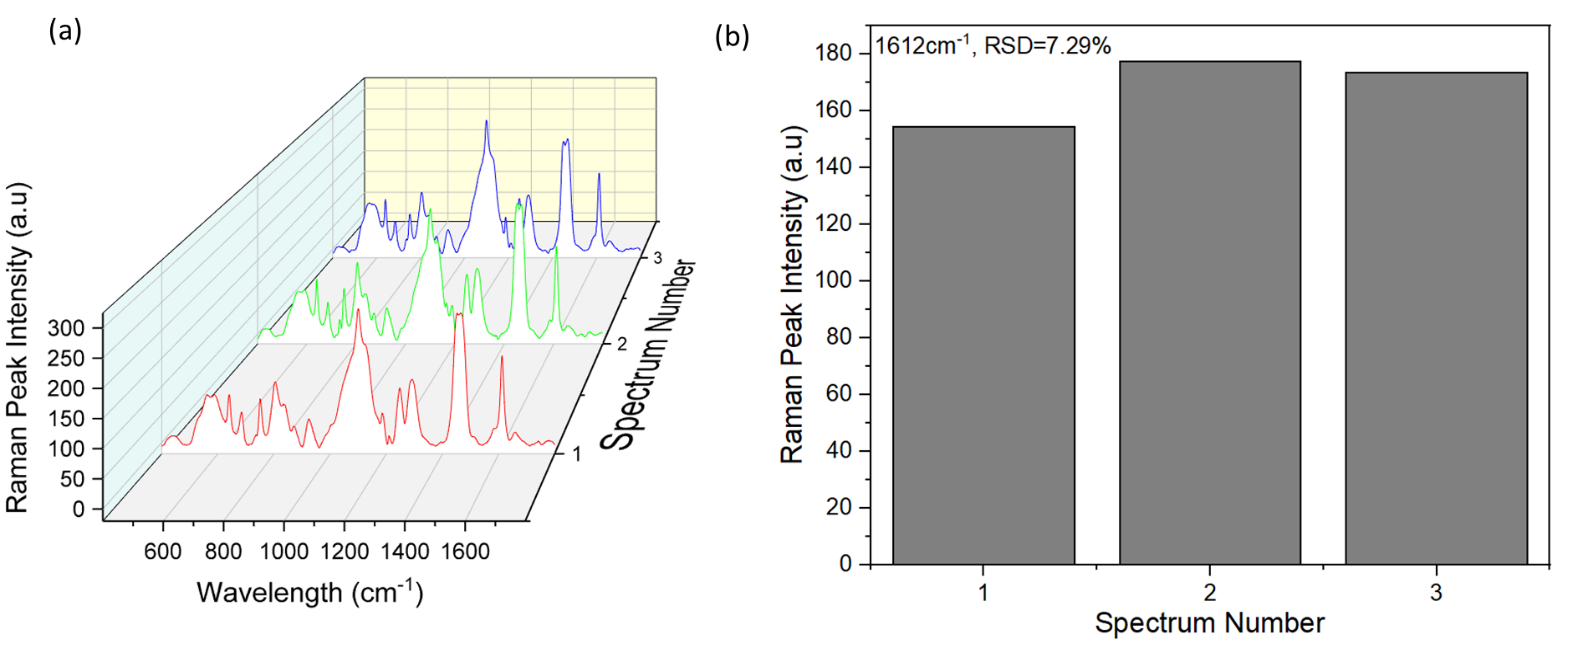


**Figure S2.** (a) SERS spectra of three random measurements of RAW 264.7 on the optimal substrate (b) SERS peak intensity at wavelength 1612cm-1 of the three random measurements of RAW 264.7 on the optimal substrate.


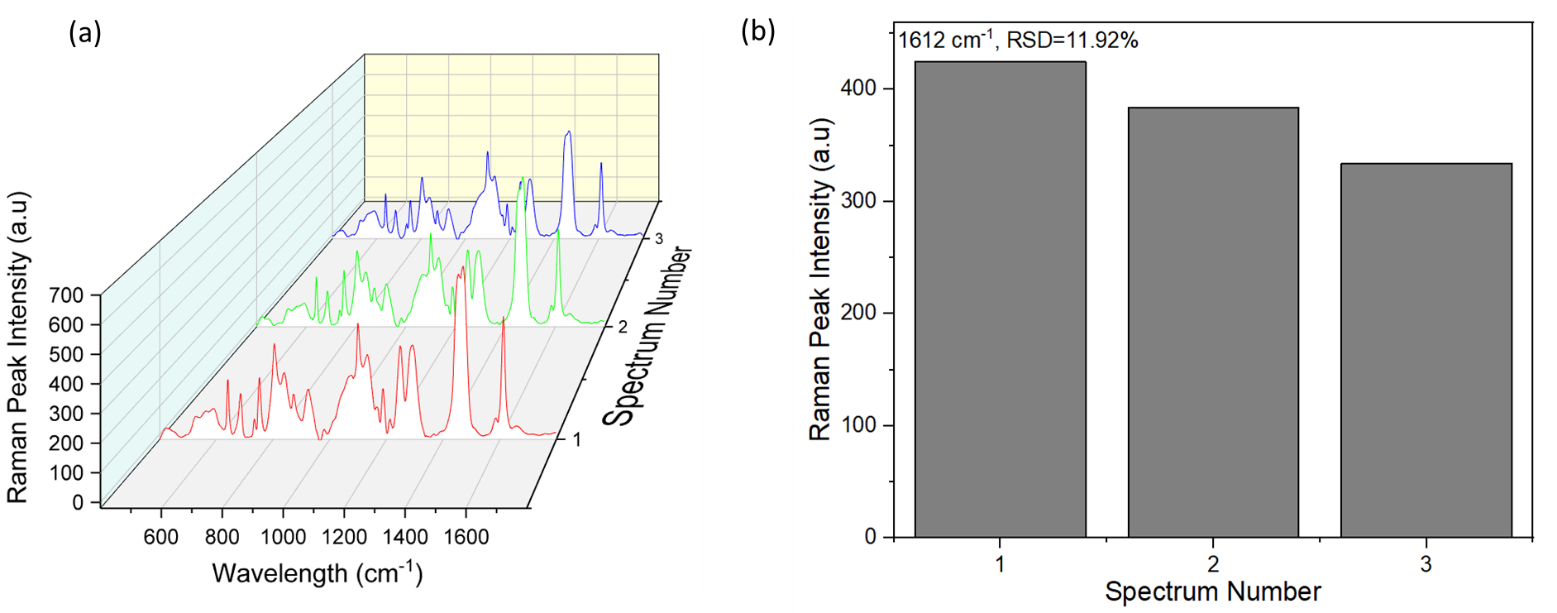


**Figure S3.** (a) SERS spectra of three random measurements of MCF-7 on the optimal substrate (b) SERS peak intensity at wavelength 1612 cm-1 of the three random measurements of MCF-7 on the optimal substrate
